# Supplementary material for: Prediction of Chemical-Protein Interactions Network with Weighted Network-Based Inference Method
Source: PLoS One. 2012 Jul 16;7(7):e41064. doi: 10.1371/journal.pone.0041064 (PMC3397956; doi:10.1371/journal.pone.0041064)
Supplement: Table S3 — The detailed description of the external validation set. The external validation set of 92 novel FDA approved and experimental drugs targeting 46 GPCRs, and 188 novel approved and experimental drugs targeting 28 kinases collected from DrugBank and KEGG. (XLS) [file pone.0041064.s005.xls]

## Sheet: GPCRs_CPI
Table S3. The external validation sets of 92 novel FDA approved and experimental drugs targeting 46 GPCRs, and 188 novel approved and experimental drugs targeting 28 kinases collected from DrugBank and KEGG.
GPCRs_Drug_ID	GPCRs_ID
DB00209	hCHRM1_92
DB00216	h5HT1A_89
DB00216	h5HT1B_124
DB00216	h5HT1D_123
DB00216	h5HT1F_141
DB00216	h5HT2B_176
DB00216	h5HT7_157
DB00217	hA1AA_162
DB00217	hA1AB_164
DB00217	hA1AD_116
DB00217	hA2AA_91
DB00217	hA2AB_96
DB00217	hA2AC_97
DB00221	hB1AR_88
DB00226	hA1AA_162
DB00226	hA1AB_164
DB00226	hA1AD_116
DB00226	hA2AA_91
DB00226	hA2AB_96
DB00226	hA2AC_97
DB00248	hDRD2_94
DB00277	hAA1_135
DB00277	hAA2A_129
DB00277	hAA2B_130
DB00283	hHRH1_163
DB00315	h5HT1B_124
DB00315	h5HT1D_123
DB00334	h5HT2A_125
DB00334	h5HT2C_126
DB00334	h5HT6_209
DB00334	hA1AA_162
DB00334	hA1AB_164
DB00334	hA1AD_116
DB00334	hA2AA_91
DB00334	hA2AB_96
DB00334	hB1AR_88
DB00334	hB2AR_84
DB00334	hB3AR_93
DB00334	hCHRM1_92
DB00334	hCHRM2_86
DB00334	hCHRM3_98
DB00334	hCHRM4_87
DB00334	hCHRM5_90
DB00334	hDRD1_103
DB00334	hDRD2_94
DB00334	hDRD3_170
DB00334	hDRD4_106
DB00334	hDRD5_107
DB00334	hHRH1_163
DB00340	hCHRM1_92
DB00340	hCHRM2_86
DB00340	hCHRM3_98
DB00340	hCHRM4_87
DB00340	hCHRM5_90
DB00357	hCCR1_149
DB00366	hCHRM1_92
DB00366	hHRH1_163
DB00372	h5HT2A_125
DB00372	h5HT2C_126
DB00372	hCHRM1_92
DB00372	hCHRM2_86
DB00372	hCHRM3_98
DB00372	hCHRM4_87
DB00372	hCHRM5_90
DB00372	hDRD1_103
DB00372	hDRD2_94
DB00372	hDRD4_106
DB00372	hHRH1_163
DB00392	hCHRM1_92
DB00413	hDRD3_170
DB00421	hAGTR1A_137
DB00429	hPTGER1_160
DB00433	h5HT2A_125
DB00433	hDRD1_103
DB00433	hDRD2_94
DB00433	hDRD3_170
DB00433	hDRD5_107
DB00433	hHRH1_163
DB00449	hA2AA_91
DB00462	hCHRM1_92
DB00497	hOPRD1_172
DB00497	hOPRK1_173
DB00497	hOPRM1_166
DB00501	hHRH2_111
DB00506	hA1AA_162
DB00517	hCHRM1_92
DB00517	hCHRM2_86
DB00517	hCHRM3_98
DB00568	hDRD1_103
DB00568	hDRD2_94
DB00568	hDRD3_170
DB00568	hDRD5_107
DB00568	hHRH1_163
DB00572	hCHRM1_92
DB00572	hCHRM2_86
DB00572	hCHRM3_98
DB00572	hCHRM4_87
DB00572	hCHRM5_90
DB00585	hHRH2_111
DB00604	h5HT4_223
DB00604	hCHRM1_92
DB00604	hCHRM2_86
DB00611	hOPRK1_173
DB00611	hOPRM1_166
DB00612	hB1AR_88
DB00612	hB2AR_84
DB00629	hA2AA_91
DB00633	hA2AA_91
DB00661	hA1AA_162
DB00661	hA1AB_164
DB00661	hA1AD_116
DB00661	hA2AA_91
DB00661	hA2AB_96
DB00661	hCHRM1_92
DB00661	hCHRM2_86
DB00665	hA1AA_162
DB00704	hOPRM1_166
DB00708	hOPRM1_166
DB00716	hHRH1_163
DB00716	hPTGDR_220
DB00723	hA1AA_162
DB00723	hA1AB_164
DB00723	hA1AD_116
DB00725	hCHRM1_92
DB00725	hCHRM2_86
DB00725	hCHRM3_98
DB00725	hCHRM4_87
DB00725	hCHRM5_90
DB00726	hCCR1_149
DB00728	hCHRM2_86
DB00751	h5HT2A_125
DB00751	hA1AA_162
DB00751	hA1AB_164
DB00751	hA1AD_116
DB00751	hA2AA_91
DB00751	hA2AB_96
DB00751	hHRH1_163
DB00751	hHRH2_111
DB00770	hPTGER1_160
DB00770	hPTGER2_181
DB00770	hPTGIR_182
DB00777	h5HT2A_125
DB00777	h5HT2C_126
DB00777	hA1AA_162
DB00777	hA1AB_164
DB00777	hA1AD_116
DB00777	hCHRM1_92
DB00777	hCHRM2_86
DB00777	hCHRM3_98
DB00777	hCHRM4_87
DB00777	hCHRM5_90
DB00777	hDRD1_103
DB00777	hDRD2_94
DB00777	hDRD4_106
DB00777	hHRH1_163
DB00800	hA2AA_91
DB00800	hA2AB_96
DB00800	hA2AC_97
DB00800	hDRD1_103
DB00800	hDRD5_107
DB00809	hCHRM1_92
DB00809	hCHRM2_86
DB00809	hCHRM4_87
DB00810	hCHRM1_92
DB00810	hCHRM2_86
DB00841	hB1AR_88
DB00841	hB2AR_84
DB00841	hB3AR_93
DB00867	hB2AR_84
DB00871	hB2AR_84
DB00876	hAGTR1A_137
DB00901	hB2AR_84
DB00902	hHRH1_163
DB00907	hDRD1_103
DB00907	hDRD3_170
DB00907	hOPRK1_173
DB00927	hHRH2_111
DB00927	hHRH3_290
DB00927	hHRH4_264
DB00929	hPTGER2_181
DB00929	hPTGER3_180
DB00933	h5HT2A_125
DB00933	hDRD1_103
DB00933	hDRD2_94
DB00933	hDRD3_170
DB00933	hDRD5_107
DB00986	hCHRM1_92
DB00986	hCHRM2_86
DB00996	hAA1_135
DB01011	hCCR1_149
DB01018	hA2AA_91
DB01018	hA2AB_96
DB01018	hA2AC_97
DB01036	hCHRM1_92
DB01036	hCHRM2_86
DB01064	hB1AR_88
DB01064	hB2AR_84
DB01064	hB3AR_93
DB01069	h5HT2A_125
DB01069	hA1AA_162
DB01069	hCHRM1_92
DB01069	hCHRM2_86
DB01069	hCHRM3_98
DB01069	hCHRM4_87
DB01069	hCHRM5_90
DB01069	hDRD2_94
DB01069	hHRH1_163
DB01069	hHRH3_290
DB01069	hHRH4_264
DB01071	hHRH1_163
DB01075	hHRH1_163
DB01075	hHRH3_290
DB01075	hHRH4_264
DB01079	h5HT4_223
DB01085	hCHRM1_92
DB01088	hPTGER1_160
DB01088	hPTGIR_182
DB01106	hHRH1_163
DB01118	hA1AA_162
DB01118	hB1AR_88
DB01124	hCCR1_149
DB01135	hCHRM2_86
DB01136	hA1AA_162
DB01136	hA1AB_164
DB01136	hA1AD_116
DB01136	hA2AA_91
DB01136	hA2AB_96
DB01136	hB1AR_88
DB01136	hB2AR_84
DB01136	hB3AR_93
DB01158	hB1AR_88
DB01158	hB2AR_84
DB01159	hCCR1_149
DB01160	h5HT2A_125
DB01160	hA1AA_162
DB01160	hA1AB_164
DB01160	hA1AD_116
DB01160	hPTGIR_182
DB01170	hA1AA_162
DB01170	hA1AB_164
DB01170	hA1AD_116
DB01170	hA2AA_91
DB01170	hA2AB_96
DB01170	hA2AC_97
DB01176	hCHRM1_92
DB01176	hCHRM2_86
DB01176	hCHRM3_98
DB01176	hHRH1_163
DB01184	hDRD2_94
DB01193	hB1AR_88
DB01193	hB2AR_84
DB01193	hB3AR_93
DB01203	hB1AR_88
DB01203	hB2AR_84
DB01203	hB3AR_93
DB01209	hOPRK1_173
DB01209	hOPRM1_166
DB01214	hB1AR_88
DB01214	hB2AR_84
DB01214	hB3AR_93
DB01223	hAA1_135
DB01227	hOPRM1_166
DB01231	hCHRM1_92
DB01231	hCHRM2_86
DB01231	hCHRM3_98
DB01235	hDRD1_103
DB01235	hDRD2_94
DB01239	hDRD1_103
DB01239	hDRD2_94
DB01355	hCCR1_149
DB01591	hCHRM1_92

## Sheet: GPCRs_COMPOUND
GPCRs_Drug_ID	SMILES
DB00209	OC(C(=O)OC1CC2CCC(C1)[N+]21CCCC1)(C1=CC=CC=C1)C1=CC=CC=C1
DB00216	CN1CCC[C@@H]1CC1=CNC2=C1C=C(CCS(=O)(=O)C1=CC=CC=C1)C=C2
DB00217	CN\C(NCC1=CC=CC=C1)=N/C
DB00221	CCC(NC(C)C)C(O)C1=CC(O)=C(O)C=C1
DB00226	NC(N)=NCC1COC2(CCCCC2)O1
DB00248	[H][C@@]12CC3=CNC4=C3C(=CC=C4)[C@@]1([H])C[C@H](CN2CC=C)C(=O)N(CCCN(C)C)C(=O)NCC
DB00277	CN1C2=C(NC=N2)C(=O)N(C)C1=O
DB00283	CN1CCC[C@@H]1CCO[C@](C)(C1=CC=CC=C1)C1=CC=C(Cl)C=C1
DB00315	CN(C)CCC1=CNC2=C1C=C(C[C@@H]1COC(=O)N1)C=C2
DB00334	CN1CCN(CC1)C1=C2C=C(C)SC2=NC2=C(N1)C=CC=C2
DB00340	CN1CCCC(CC2C3=C(SC4=C2C=CC=C4)C=CC=C3)C1
DB00357	CCC1(CCC(=O)NC1=O)C1=CC=C(N)C=C1
DB00366	CN(C)CCOC(C)(C1=CC=CC=C1)C1=NC=CC=C1
DB00372	CCSC1=CC2=C(SC3=C(C=CC=C3)N2CCCN2CCN(C)CC2)C=C1
DB00392	CCN(CC)C(C)CN1C2=C(SC3=C1C=CC=C3)C=CC=C2
DB00413	CCCN[C@@H]1CCC2=C(C1)SC(N)=N2
DB00421	[H][C@@]12CC[C@@]3(CCC(=O)O3)[C@@]1(C)CC[C@@]1([H])[C@@]2([H])[C@@]([H])(CC2=CC(=O)CC[C@]12C)SC(C)=O
DB00429	CCCCC[C@](C)(O)\C=C\[C@H]1[C@H](O)C[C@H](O)[C@@H]1C\C=C\CCCC(O)=O
DB00433	CN1CCN(CCCN2C3=C(SC4=C2C=C(Cl)C=C4)C=CC=C3)CC1
DB00449	CNCC(O)C1=CC(OC(=O)C(C)(C)C)=C(OC(=O)C(C)(C)C)C=C1
DB00462	[H][C@]12C[C@@H](C[C@@]([H])(C3OC13)[N+]2(C)C)OC(=O)[C@H](CO)C1=CC=CC=C1
DB00497	[H][C@@]12OC3=C(OC)C=CC4=C3[C@@]11CCN(C)[C@]([H])(C4)[C@]1(O)CCC2=O
DB00501	C\N=C(\NCCSCC1=C(C)NC=N1)NC#N
DB00506	[H][C@@]12CC[C@@](O)(C#C)[C@@]1(CC)CC[C@]1([H])[C@@]3([H])CCC(=O)C=C3CC[C@@]21[H]
DB00517	[H][C@]12CC[C@]([H])(C[C@@H](C1)OC(=O)C(CCC)CCC)[N+]2(C)C
DB00568	C(C=CC1=CC=CC=C1)N1CCN(CC1)C(C1=CC=CC=C1)C1=CC=CC=C1
DB00572	[H][C@]12CC[C@]([H])(CC(C1)OC(=O)C(CO)C1=CC=CC=C1)N2C
DB00585	CN\C(NCCSCC1=CSC(CN(C)C)=N1)=C/[N+]([O-])=O
DB00604	COC1CN(CCCOC2=CC=C(F)C=C2)CCC1NC(=O)C1=C(OC)C=C(N)C(Cl)=C1
DB00611	[H][C@@]12CC3=C(C=C(O)C=C3)[C@]3(CCCC[C@@]13O)CCN2CC1CCC1
DB00612	CC(C)NCC(O)COC1=CC=C(COCCOC(C)C)C=C1
DB00629	NC(N)=NN=CC1=C(Cl)C=CC=C1Cl
DB00633	CC(C1=CN=CN1)C1=C(C)C(C)=CC=C1
DB00661	COC1=C(OC)C=C(CCN(C)CCCC(C#N)(C(C)C)C2=CC(OC)=C(OC)C=C2)C=C1
DB00665	CC1(C)NC(=O)N(C1=O)C1=CC(=C(C=C1)[N+]([O-])=O)C(F)(F)F
DB00704	[H][C@@]12OC3=C(O)C=CC4=C3[C@@]11CCN(CC3CC3)[C@]([H])(C4)[C@]1(O)CCC2=O
DB00708	CCC(=O)N(C1=CC=CC=C1)C1(COC)CCN(CCC2=CC=CS2)CC1
DB00716	CCCC1=C2OC(=CC(=O)C2=CC2=C1N(CC)C(=CC2=O)C(O)=O)C(O)=O
DB00723	COC1=CC(C(O)C(C)N)=C(OC)C=C1
DB00725	[H][C@]12CC[C@]([H])(C[C@@H](C1)OC(=O)C(O)C1=CC=CC=C1)[N+]2(C)C
DB00726	CC(CN(C)C)CN1C2=C(CCC3=C1C=CC=C3)C=CC=C2
DB00728	[H][C@@]12C[C@@H]([C@H](OC(C)=O)[C@@]1(C)CC[C@@]1([H])[C@@]2([H])CC[C@@]2([H])C[C@H](O)[C@H](C[C@]12C)N1CCOCC1)[N+]1(CC=C)CCCC1
DB00751	NC1=NCC2N1C1=C(CC3=C2C=CC=C3)C=CC=C1
DB00770	CCCCC[C@H](O)C=C[C@H]1[C@H](O)CC(=O)[C@@H]1CCCCCCC(O)=O
DB00777	CCC(=O)C1=CC2=C(SC3=C(C=CC=C3)N2CC(C)N(C)C)C=C1
DB00800	OC1=CC=C(C=C1)C1CNCCC2=C1C=C(O)C(O)=C2Cl
DB00809	CCN(CC1=CC=NC=C1)C(=O)C(CO)C1=CC=CC=C1
DB00810	OC(CCN1CCCCC1)(C1CC2CC1C=C2)C1=CC=CC=C1
DB00841	CC(CCC1=CC=C(O)C=C1)NCCC1=CC(O)=C(O)C=C1
DB00867	C[C@H](NCCC1=CC=C(O)C=C1)[C@H](O)C1=CC=C(O)C=C1
DB00871	CC(C)(C)NCC(O)C1=CC(O)=CC(O)=C1
DB00876	CCCCC1=NC=C(C=C(CC2=CC=CS2)C(O)=O)N1CC1=CC=C(C=C1)C(O)=O
DB00901	CC1=CC=C(C=C1)C(=O)OC1=C(OC(=O)C2=CC=C(C)C=C2)C=C(C=C1)C(O)CNC(C)(C)C
DB00902	CN1CCC(CN2C3=C(SC4=C2C=CC=C4)C=CC=C3)C1
DB00907	COC(=O)[C@@H]1C2CCC(C[C@@H]1OC(=O)C1=CC=CC=C1)N2C
DB00927	NC(N)=NC1=NC(CSCCC(N)=NS(N)(=O)=O)=CS1
DB00929	CCCCC(C)(O)C\C=C\[C@H]1[C@H](O)CC(=O)[C@@H]1CCCCCCC(=O)OC
DB00933	CN1CCCCC1CCN1C2=C(SC3=C1C=C(C=C3)S(C)=O)C=CC=C2
DB00986	C[N+]1(C)CCC(C1)OC(=O)C(O)(C1CCCC1)C1=CC=CC=C1
DB00996	NCC1(CC(O)=O)CCCCC1
DB01011	CC(C)(C(=O)C1=CC=CN=C1)C1=CC=CN=C1
DB01018	NC(=N)NC(=O)CC1=C(Cl)C=CC=C1Cl
DB01036	CC(C)N(CC[C@@H](C1=CC=CC=C1)C1=CC(C)=CC=C1O)C(C)C
DB01064	CC(C)NCC(O)C1=CC(O)=C(O)C=C1
DB01069	CC(CN1C2=C(SC3=C1C=CC=C3)C=CC=C2)N(C)C
DB01071	C(C1CN2CCC1CC2)N1C2=C(SC3=C1C=CC=C3)C=CC=C2
DB01075	CN(C)CCOC(C1=CC=CC=C1)C1=CC=CC=C1
DB01079	CCCCC\N=C(/N)NN\C=C1/C=NC2=C1C=C(CO)C=C2
DB01085	CC[C@H]1[C@@H](CC2=CN=CN2C)COC1=O
DB01088	CC#CCC(C)C(O)\C=C\C1C(O)CC2C\C(CC12)=C\CCCC(=O)OCC(=O)C1=CC=CC=C1
DB01106	C[C@@H]1CN(CC[C@]1(C(O)=O)C1=CC=CC=C1)C1CCC(CC1)(C#N)C1=CC=C(F)C=C1
DB01118	CCCCC1=C(C(=O)C2=CC(I)=C(OCCN(CC)CC)C(I)=C2)C2=C(O1)C=CC=C2
DB01124	CCCCNC(=O)NS(=O)(=O)C1=CC=C(C)C=C1
DB01135	COC1=CC(CC2C3=C(CC[N+]2(C)CCCOC(=O)CCC(=O)OCCC[N+]2(C)CCC4=C(C2CC2=CC(OC)=C(OC)C(OC)=C2)C(OC)=C(OC)C(OC)=C4)C=C(OC)C(OC)=C3OC)=CC(OC)=C1OC
DB01136	COC1=C(OCCNCC(O)COC2=CC=CC3=C2C2=C(N3)C=CC=C2)C=CC=C1
DB01158	CC[N+](C)(C)CC1=C(Br)C=CC=C1
DB01159	FC(F)(F)C(Cl)Br
DB01160	CCCCC[C@H](O)\C=C\[C@H]1[C@H](O)C[C@H](O)[C@@H]1C\C=C/CCCC(O)=O
DB01170	NC(N)=NCCN1CCCCCCC1
DB01176	CN1CCN(CC1)C(C1=CC=CC=C1)C1=CC=CC=C1
DB01184	ClC1=CC2=C(C=C1)N(C1CCN(CCCN3C(=O)NC4=C3C=CC=C4)CC1)C(=O)N2
DB01193	CCCC(=O)NC1=CC(C(C)=O)=C(OCC(O)CNC(C)C)C=C1
DB01203	CC(C)(C)NCC(O)COC1=CC=CC2=C1C[C@H](O)[C@H](O)C2
DB01209	[H][C@@]12CC3=C(C=C(O)C=C3)[C@@](C)(CCCCC1)C2N
DB01214	CC(C)NCC(O)COC1=C(C)C(C)=C(OC(C)=O)C(C)=C1
DB01223	CN1C2=C(NC=N2)C(=O)N(C)C1=O
DB01227	CC[C@H](OC(C)=O)C(C[C@H](C)N(C)C)(C1=CC=CC=C1)C1=CC=CC=C1
DB01231	OC(CCCN1CCCCC1)(C1=CC=CC=C1)C1=CC=CC=C1
DB01235	N[C@@H](CC1=CC(O)=C(O)C=C1)C(O)=O
DB01239	CN(C)CCC=C1C2=C(SC3=C1C=C(Cl)C=C3)C=CC=C2
DB01355	CN1C(=O)NC(=O)C(C)(C1=O)C1=CCCCC1
DB01591	O=C(O[C@H]1CN2CCC1CC2)N1CCC2=C(C=CC=C2)[C@@H]1C1=CC=CC=C1

## Sheet: Kinase_CPI
Table S3. The external validation sets of 92 novel FDA approved and experimental drugs targeting 46 GPCRs, and 188 novel approved and experimental drugs targeting 28 kinases collected from DrugBank and KEGG.
Drug_ID	Kinases_ID
DB07137	hCDK2_583
DB04662	hCDK2_583
DB07125	hDAPK3_1202
DB07608	hDYRK1A_113
DB07860	hPKAa_2422
DB06959	hPKAa_2422
DB06977	hPKAa_2422
DB07124	hPKAa_2422
DB03217	hSRC_2204
DB07676	hCAMK4_1879
DB07676	hGSK3b_231
DB01772	hGSK3b_231
DB07889	hCDK2_583
DB07755	hCDK2_583
DB07501	hCDK2_583
DB07751	hCDK2_583
DB07242	hDAPK3_1202
DB07788	hERK1_388
DB07458	hPKAa_2422
DB07583	hPKAa_2422
DB08068	hp38a_494
DB07905	hERK1_388
DB02950	hCDK2_583
DB01866	hSRC_2204
DB07812	hGSK3b_231
DB07264	hERK1_388
DB07855	hPKAa_2422
DB03374	hPKAa_2422
DB07766	hCAMK2D_1471
DB07750	hCDK2_583
DB07504	hCDK2_583
DB07054	hCDK2_583
DB07761	hCDK2_583
DB07996	hPKAa_2422
DB08192	hSRC_2204
DB02611	hPKAa_2422
DB04604	hCSNK1G2_1221
DB03122	hp38a_494
DB06888	hCDK2_583
DB08150	hPKAa_2422
DB08218	hCDK2_583
DB07210	hCDK2_583
DB07595	hCDK2_583
DB04669	hCDK2_583
DB07493	hCDK2_583
DB01988	hp38a_494
DB06948	hCDK2_583
DB03583	hCDK2_583
DB03684	hPKAa_2422
DB02482	hAURa_2362
DB02482	hERK1_388
DB02482	hp38g_474
DB02482	hPKAa_2422
DB02482	hPKCt_2008
DB07607	hp38a_494
DB08521	hERK1_388
DB08462	hSRC_2204
DB03490	hCDK2_583
DB02336	hSRC_2204
DB03268	hSRC_2204
DB03591	hSRC_2204
DB03712	hSRC_2204
DB01908	hSRC_2204
DB01678	hSRC_2204
DB04495	hSRC_2204
DB03104	hSRC_2204
DB08590	hIRAK4_908
DB01807	hp38a_494
DB04716	hDAPK3_1202
DB04716	hJAK3_d2_778
DB03023	hSRC_2204
DB03663	hCDK2_583
DB08247	hCDK2_583
DB00163	hPKCa_1986
DB00163	hPKCb1_2040
DB08097	hp38a_494
DB07335	hSRC_2204
DB08054	hSRC_2204
DB07546	hCSNK2A1_457
DB01064	hERK1_388
DB08703	hMAP3K9_1226
DB02155	hPKAa_2422
DB07802	hCSNK1A1_1040
DB07179	hCDK2_583
DB00605	hMAPKAPK3_1328
DB08219	hCDK2_583
DB03828	hSRC_2204
DB08454	hCAMK1_1725
DB08513	hERK1_388
DB07852	hCDK2_583
DB04101	hCDK2_583
DB07584	hGSK3b_231
DB08070	hPKAa_2422
DB03628	hSRC_2204
DB07606	hCDK2_583
DB00144	hPKCa_1986
DB01919	hPKAa_2422
DB02440	hPKAa_2422
DB08231	hPKAa_2422
DB08182	hCDK2_583
DB07266	hAURa_2362
DB08096	hp38a_494
DB07010	hERK1_388
DB07010	hJNK3_261
DB07065	hCDK2_583
DB08021	hJNK3_261
DB07585	hGSK3b_231
DB00331	hNUAK1_2187
DB06877	hERK1_388
DB02010	hCDK2_583
DB02010	hGSK3b_231
DB02010	hPKCt_2008
DB03496	hCDK2_583
DB07186	hAURa_2362
DB07622	hCDK2_583
DB04721	hCSNK1A1_1040
DB07362	hAURa_2362
DB08242	hp38a_494
DB07168	hCAMK2G_1496
DB08122	hCDK2_583
DB07791	hCDK2_583
DB08123	hCDK2_583
DB02432	hSRC_2204
DB08555	hJNK3_261
DB07845	hMAP3K8_2389
DB08053	hSRC_2204
DB08178	hCDK2_583
DB07488	hCSNK1G1_1165
DB07058	hGSK3b_231
DB03306	hSRC_2204
DB02963	hCDK2_583
DB07942	hp38a_494
DB07829	hp38a_494
DB07217	hJNK3_261
DB08345	hCSNK1A1_1040
DB07966	hSRC_2204
DB08340	hCSNK1A1_1040
DB01769	hCDK2_583
DB01962	hSRC_2204
DB03801	hCDK2_583
DB01738	hPKCb1_2040
DB04522	hPKAa_2422
DB03398	hSRC_2204
DB04530	hPKAa_2422
DB07529	hCDK2_583
DB08113	hPKAa_2422
DB03127	hCSNK1A1_1040
DB00914	hNUAK1_2187
DB08126	hCDK2_583
DB08241	hCDK2_583
DB08423	hp38a_494
DB07489	hCSNK1G1_1165
DB02603	hCDK2_583
DB08114	hPKAa_2422
DB03019	hCDK2_583
DB03307	hCDK2_583
DB04395	hCSNK1A1_1040
DB04395	hGSK3b_231
DB04395	hJNK3_261
DB04395	hp38g_474
DB03431	hAURa_2362
DB03431	hGSK3b_231
DB00171	hNUAK1_2187
DB02898	hCDK2_583
DB08149	hPKAa_2422
DB08148	hPKAa_2422
DB07618	hCDK2_583
DB03693	hCSNK1G2_1221
DB02973	hCDK2_583
DB07126	hCDK2_583
DB08248	hCDK2_583
DB04447	hCAMK2D_1471
DB01893	hSRC_2204
DB03078	hSRC_2204
DB03114	hSRC_2204
DB08011	hJNK3_261
DB06944	hCDK2_583
DB07020	hMAP3K9_1226
DB02647	hCDK2_583
DB08338	hCSNK1A1_1040
DB06844	hCDK2_583
DB08124	hCDK2_583
DB08125	hCDK2_583
DB01169	hERK1_388
DB04080	hSRC_2204
DB03902	hSRC_2204
DB04272	hSRC_2204
DB02175	hSRC_2204
DB01765	hCSNK1A1_1040
DB08660	hCSNK1A1_1040
DB01940	hPKAa_2422
DB08233	hCDK2_583
DB03110	hp38a_494
DB04707	hPKAa_2422
DB07943	hp38a_494
DB06983	hCDK2_583
DB02195	hp38a_494
DB02908	hSRC_2204
DB01947	hSRC_2204
DB03298	hSRC_2204
DB02762	hSRC_2204
DB03525	hSRC_2204

## Sheet: Kinase_COMPOUND
Kinase_Drugs_ID	SMILES
DB00144	CCCC(=O)O[C@H](COC(=O)CC)COP(O)(=O)OC[C@H](N)C(O)=O
DB00163	CC(C)CCC[C@@H](C)CCC[C@@H](C)CCC[C@]1(C)CCC2=C(O1)C(C)=C(C)C(O)=C2C
DB00171	NC1=NC=NC2=C1N=CN2[C@@H]1O[C@H](CO[P@](O)(=O)O[P@](O)(=O)OP(O)(O)=O)[C@@H](O)[C@H]1O
DB00331	CN(C)C(=N)NC(N)=N
DB00605	CC1=C(CC(O)=O)C2=C(C=CC(F)=C2)C1=CC1=CC=C(C=C1)S(C)=O
DB00914	NC(=N)NC(=N)NCCC1=CC=CC=C1
DB01064	CC(C)NCC(O)C1=CC(O)=C(O)C=C1
DB01169	O1[As]2O[As]1O2
DB01678	CC(=O)N[C@@H](CC1=CC=C(OP(O)(O)=O)C(C=O)=C1)C(=O)N[C@@H]1CCCCN(CC2=CC=C(C=C2)C2=CC=CC=C2)C1=O
DB01738	N[C@@H](CO)COP(O)(O)=O
DB01765	OC(=O)CC1=C2NC(=O)C3=C(C=CC=C3)N2C2=C1C=CC=C2
DB01769	N[C@@H](C[S](=O)=O)C(O)=O
DB01772	[H][C@@](O)(CO)CNC1=CC=CC(=C1)C1=C(C(=O)NC1=O)C1=CN(C)C2=C1C=C(F)C=C2
DB01807	CC(C)(C)C1=C\C(N(N1)C1=CC=CC=C1)=N/C(=O)NC1=CC=C(Cl)C=C1
DB01866	[H][C@](C(O)=O)(C1=CC=CC=C1)S(O)(=O)=O
DB01893	O[C@H]1[C@H](CO[P@](O)(=O)OP(O)(O)=O)O[C@H]([C@@H]1O)N1C=NC2=C1N=CN=C2NCC1=CC=CC=C1
DB01908	CC(=O)N[C@@H](CC1=CC=C(OCC(O)=O)C(=C1)P(O)(O)=O)C(=O)N[C@@H]1CCCCN(CC2=CC=C(C=C2)C2=CC=CC=C2)C1=O
DB01919	CCCCC=O
DB01940	OC1=CC=C(C=C1)C(=O)N[C@H]1CNCCC[C@H]1OC(=O)C1=CC=C(C=C1)C(=O)C1=CC=CC=C1O
DB01947	OP(O)(=O)OC1=C(C=O)C=CC=C1
DB01962	N[C@@H](CC1=CC=C(OP(O)(O)=O)C=C1)C(O)=O
DB01988	C([C@H]1CN(CCN1)C1=NN=C(C2=CC3=C(C=CC=C3)C=C2)C(=C1)C1=CC=NC=C1)C1=CC=CC=C1
DB02010	CN[C@@H]1C[C@@H]2O[C@](C)([C@@H]1OC)N1C3=C(C=CC=C3)C3=C1C1=C(C4=C(C=CC=C4)N21)C1=C3CNC1=O
DB02155	CC[C@@H](C)C1=CC(=CC=C1O)C(=O)N[C@H]1CNCCC[C@H]1OC(=O)C1=CC=C(C=C1)C(=O)C1=CC(OC)=CC=C1O
DB02175	OC(=O)CC(O)=O
DB02195	ON1C2=C(N=CC=C2)C(=C1C1=CC=NC=C1)C1=CC=C(F)C=C1
DB02336	CC(=O)N[C@@H](CC1=CC=C(C(=C1)P(O)(O)=O)P(O)(O)=O)C(=O)N[C@@H]1CCCCN(CC2=CC=C(C=C2)C2=CC=CC=C2)C1=O
DB02432	COC(=O)C1=CC(C[C@@H](NC(C)=O)C(=O)N[C@@H]2CCCCN(CC3=CC=C(C=C3)C3=CC=CC=C3)C2=O)=CC=C1C(F)(C(O)=O)C(O)=O
DB02440	CCCCCCCC
DB02482	C[C@H](OP(O)(O)=O)[C@@H](N)C(O)=O
DB02603	NC1=NC(OCC2CCCCC2)=C2N=CNC2=C1
DB02611	[H][C@]1(CNCCC[C@@]1([H])OC(=O)C1=CC=C(O)C=C1)NC(=O)C1=CC=C(O)C=C1
DB02647	O=C(NC1=CC(=NN1)C1CC1)C1=CC=CC=C1
DB02762	OP(O)(=O)OC1=CC=CC2=C1N=C(C=C2)C#N
DB02898	Nc1nc(OC[C@H]2CCC(=O)N2)c2ncnc2n1
DB02908	OP(O)(=O)C(C1=CC=CC=C1)P(O)(O)=O
DB02950	[H][C@@]12C=C(Br)N=C1C(=O)NCC[C@]2([H])C1=NC(N)=NC1=O
DB02963	CS(=O)(=O)C1=CC=C(NC2=CC(Cl)=NC3=CC=NN23)C=C1
DB02973	NS(=O)(=O)C1=CC=C(C=C1)\N=N\C1=C2C=C(Br)C=CC2=NC1=O
DB03019	NC1=NC=CC(=N1)C1=C(Cl)SC(Cl)=C1
DB03023	CC(C)(C)N1[NH+]=C(C2=C1N=CN=C2N)C1=CC=C(Cl)C=C1
DB03078	O[P@@](=O)(OCC1=CC=CC=C1)OC1=CC=CC=C1C=O
DB03104	CC(=O)N\C(=C/C1=CC=C(CC(O)=O)C(C=O)=C1)C(=O)N[C@@H]1CCCCN(CC2=CC=C(C=C2)C2=CC=CC=C2)C1=O
DB03110	OC1=CC=CC=C1Cl
DB03114	O[P@@](=O)(OCC1CCCCC1)OC1=CC=CC=C1C=O
DB03122	[H][C@]1(CO)O[C@@]([H])(OCCCCCCCC)[C@]([H])(O)[C@@]([H])(O)[C@]1([H])O
DB03127	NC(=[NH2+])C1=CC=CC=C1
DB03217	[H][C@@](O)(C1=CC=CC2=C1C=CC=C2)P(O)(O)=O
DB03268	CC(=O)N[C@@H](CC1=CC=C(C(O)=O)C(C=O)=C1)C(=O)N[C@@H]1CCCCN(CC2=CC=C(C=C2)C2=CC=CC=C2)C1=O
DB03298	OP(O)(=O)OC1=CC=CC=C1
DB03306	COC1=CC=CC(C=O)=C1OP(O)(O)=O
DB03307	NC1=NC=NC(NC2=CC=C(C=C2)S(N)(=O)=O)=C1
DB03374	[H][C@](N)(CC1=CC(I)=C(O)C(I)=C1)C(O)=O
DB03398	N[C@@H](CSO)C(O)=O
DB03431	NC1=NC=NC2=C1N=CN2[C@@H]1O[C@@H](CO[P@](O)(=O)OP(O)(O)=O)[C@H](O)[C@H]1O
DB03490	C1C2=C(C=CC=C2)C2=NNC(=C12)C1=CC=NC=C1
DB03496	CN1CC[C@@H]([C@H](O)C1)C1=C(O)C=C(O)C2=C1OC(=CC2=O)C1=CC=CC=C1Cl
DB03525	OP(O)(=O)OC1=CC=CC2=C1NCCC2
DB03583	C[C@]1(O)C2=C(N\C1=C1/C(=O)NC3=C1C=C(C=C3)S(=O)(=O)N1CCC(O)CC1)C=CC=C2
DB03591	CC(=O)N[C@@H](CC1=CC=C(C=C1)C(F)(F)P(O)(O)=O)C(=O)N[C@@H]1CCCCN(CC2=CC=C(C=C2)C2=CC=CC=C2)C1=O
DB03628	CCC1=CC=C(NC(=O)P(O)(O)=O)C=C1
DB03663	CC(C)C(=O)COC1=NC(N)=NC2=C1NC=N2
DB03684	C[C@H](O)CC(C)(C)O
DB03693	NCCNS(=O)(=O)C1=CC=C(Cl)C2=C1C=NC=C2
DB03712	CC(=O)N[C@@H](CC1=CC=C(CC(O)=O)C(=C1)C(O)=O)C(=O)N[C@@H]1CCCCN(CC2=CC=C(C=C2)C2=CC=CC=C2)C1=O
DB03801	N[C@@H](CCCCNC(O)=O)C(O)=O
DB03828	CC1=CC(C=O)=C(OP(O)(O)=O)C(C=O)=C1
DB03902	OC(=O)C(O)=O
DB04080	OC(=O)C(C(O)=O)C1=CC=CC=C1
DB04101	CC1=NC(C)=C(S1)C1=NC(N\C=N/O)=NC=C1
DB04272	OC(=O)CC(O)(CC(O)=O)C(O)=O
DB04395	NC1=NC=NC2=C1N=CN2[C@@H]1O[C@@H](CO[P@](O)(=O)O[P@@](O)(=O)NP(O)(O)=O)[C@H](O)[C@H]1O
DB04447	O[C@H](CS)[C@H](O)CS
DB04495	CC(=O)N[C@@H](CC1=CC=C(OP(O)(O)=O)C=C1)C(=O)N[C@@H]1CCCCN(CC2=CC=C(C=C2)C2=CC=CC=C2)C1=O
DB04522	N[C@@H](COP(O)(O)=O)C(O)=O
DB04530	N[C@@H](CSSCCO)C(O)=O
DB04604	[H][C@]1(CO)O[C@@]([H])(N2C=C(I)C3=C2N=CN=C3N)[C@]([H])(O)[C@]1([H])O
DB04662	[H][C@@](CC)(CO)NC1=NC2=C(N=CN2C(C)C)C(NCC2=CC=CC=C2O)=N1
DB04669	BrC1=CC(=CC=C1)C1=CC(NCC2=CC=NC=C2)=[N+]2NC=NC2=N1
DB04707	OC1=NC=CC2=C1C=CC=C2S(=O)(=O)N1CCCNCC1
DB04716	CC(C)(C)C1=NC2=C3C=CC(F)=CC3=C3C(=O)NC=CC3=C2N1
DB04721	CN1CCN2C1=NC1=C(Br)C(Br)=C(Br)C(Br)=C21
DB06844	O=C1N=C2C=CC3=C(SC=N3)C2=C1CNC1=CC=C(C=C1)S(=O)(=O)NC1=CC=CC=N1
DB06877	CN(C)C(=O)C1=CC(=CN1)C1=NNC=C1C1=CC=CC=C1
DB06888	[H][C@]12CN(CCN3NC4=C(C=CC=C4C4=NC5=C(NC4=O)C=CC=C5O1)C3=O)[C@]([H])(C)C2
DB06944	O=C(CC1=CC2=C(C=CC=C2)C=C1)NC1=CC(=NN1)C1CC1
DB06948	C(OC1=C2NC=NC2=NC(NC2=CC=CC=C2)=N1)C1CCCCC1
DB06959	[H][C@@](N)(COC1=CC(=CN=C1)C1=CC2=C(C=C1)C=NC=C2)C[C@@]1([H])C=NC2=C1C=CC=C2
DB06977	[H][C@@](N)(COC1=CC(=CN=C1)C1=CC2=C(NN=C2)C=C1)CC1=C2C=CC=C[C@@]2([H])N=C1
DB06983	OCC1=C2N=C(C=C(NCC3=CC=CN=C3)N2N=C1)C1=CC=CC=C1
DB07010	ClC1=CC(=CC=C1)C1=CNN=C1C1=CNC(=C1)C(=O)NCC1=CC=CC=C1
DB07020	O=C(NC1=CC(=CC=C1)C1=NNC2=C1C=C(C=C2)C1=NNC=N1)C1=CC=CO1
DB07054	[H][C@](O)(COC1=CC=C(NC2=NC=NC(NC3=C(F)C=CC(=C3)C(F)(F)F)=C2)C=C1)CN(C)C
DB07058	COC1=CC=C(C=C1)N1C=NC2=C1C=C(C=C2)C1=NNC(=S)O1
DB07065	ClC1=CC=CC(C2=NC3=C(SC#N)C=NN3C(NCC3=CC=NC=C3)=C2)=C1Cl
DB07124	[H][C@@](N)(COC1=CN=CC(=C1)C1=NCC2=NN=CC2=C1)CC1=C2C=CCC=C2N=C1
DB07125	[H][C@@](CC)(CO)NC1=NN2C(C=C1)=NC=C2C1=CC=C(C=C1)C(O)=O
DB07126	NS(=O)(=O)C1=CC=C(NC2=NC(OCC3CCCCC3)=C3N=CNC3=N2)C=C1
DB07137	[H][C@@](C)(C(=O)\N=C1\C=C(N=N\1)C1CC1)C1=CC=C(C=C1)N1CCNC1=O
DB07168	CNC1=NC(NC2=CC=C(CC#N)C=C2)=NC(NC2=NNC(=C2)C2CC2)=C1
DB07179	CC1=C(C=CC=C1)C1=NC2=C(Br)C=NN2C(NCC2=CC=C[N+]([O-])=C2)=C1
DB07186	CN1CCN(CC1)C1=CC=C(C=C1)C(=O)NC1=NNC2=CN(C=C12)C(=O)CC1=CC=CS1
DB07210	BrC1=C2N=C(C=C(NCC3=CC=NC=C3)N2N=C1)C1=CC=CC=C1
DB07217	FC1=CC=CC=C1C(=O)NC1=C(C#N)C2=C(CCCC2)S1
DB07242	[H][C@@]1(C#N)C2=C(N(C)C3=C2C=CC(Cl)=C3Cl)C(=O)NC11CCN(C)CC1
DB07264	[H][C@](CO)(NC(=O)C1=CC(=CN1)C1=NNC=C1C1=CC(Cl)=CC=C1)C1=CC(Cl)=C(F)C=C1
DB07266	CCN1C(=O)C(C)(C)C2=CC3=C(C=C12)C1=C(N3)C2=C(CCC1)C(C)=NN2
DB07335	CC(C)N1N=C(C2=C1N=CN=C2N)C1=CC(O)=CC=C1
DB07362	CN1N=CC2=C1C(NCCC1=CN=C(NC(=O)NC3=CC=CC(=C3)C(F)(F)F)S1)=NC=N2
DB07458	[H][C@@]1(CCN2C=C(C3=C2C=CC=C3)C2=C(C(=O)NC2=O)C2=CNC3=C2C=CC=C3)CCCN1C
DB07488	COC1=CC=C(C=C1)\N=C1\NC(N)=C(S1)C(=O)C1=CC=C(OC)C=C1
DB07489	NC1=C(SC(NC2=CC=CC(Cl)=C2)=[NH+]1)C(=O)C1=CC=C(F)C=C1
DB07493	BrC1=CC2=C(NC(=O)\C2=C2/NC3=C(C=CC=C3)C2=O)C=C1
DB07501	[H][C@@](O)(COC1=CC=C(NC2=NC(NC3=CC=CC=C3)=C(Br)C=N2)C=C1)CN(C)C
DB07504	[H][C@](O)(COC1=CC=C(NC2=NC(NC3=CC=CC=C3)=C(Br)C=N2)C=C1)CN(C)C
DB07529	N=C1NC(=O)\C(S1)=C/C1=NC=CC=C1
DB07546	CC(C)NC1=CC2=C(C=NN2C2=NC(=CN=C2)N2C=CC(CC(O)=O)=C2)C=C1
DB07583	[H][C@@]1(CNS(=O)(=O)C2=CC=CC3=C2C=CN=C3)C[C@]([H])(CN1)OCC1=CC=C(Cl)C=C1
DB07584	CC1=NN=C(N1)C1=CC=CC=C1NC1=NC=NC2=C1C=CN2
DB07585	ClC1=CNC2=C1C(=NC=N2)N1CCC2=C(C1)N=CN2
DB07595	BrC1=CC(=CC=C1)C1=CC(NCC2=CC=NC=C2)=[N+]2NC=CC2=N1
DB07606	CCC1=NN(C2=C1C(=O)NC(CC1=CC(O)=C(O)C=C1)=N2)C1=C(Cl)C=C(Cl)C=C1Cl
DB07607	C[S@@](=O)C1=CC=C(C=C1)C1=NC(=C(N1)C1=CC(I)=CC=C1)C1=CC=NC=C1
DB07608	[H][C@@](CCN)(C(=O)NC1=CC2=C(NN=C2NC(=O)C2=CC=CC=C2)C=C1)C1=CC=CC(Cl)=C1
DB07618	NCC1CCN(CC1)CC(=O)NC1=CC=CC2=C1C(=O)C1=C(NN=C21)C1CCCCC1
DB07622	CN1CCN(CC1)NC(=O)NC1=CC=CC2=C1C(=O)C1=C(NN=C21)C1=C(C)N=C(C)S1
DB07676	[H][C@@](O)(CO)CCONC1=C(NC2=C1C=CC=C2)C1=C2C=CC=CC2=NC1=O
DB07750	[H][C@](O)(COC1=CC=C(NC2=NC(NC3=C(Cl)C=CC(Cl)=C3)=CC=N2)C=C1)CN(C)C
DB07751	[H][C@@](O)(COC1=CC=C(NC2=NC=NC(NC3=C(F)C=CC=C3F)=C2)C=C1)CN(C)C
DB07755	[H][C@@](O)(COC1=CC=C(NC2=NC(NC3=C(Cl)C=CC(Cl)=C3)=CC=N2)C=C1)CN(C)C
DB07761	[H][C@](O)(COC1=CC=C(NC2=NC=NC(NC3=C(F)C=CC=C3F)=C2)C=C1)CN(C)C
DB07766	[H][C@](O)(CO)CCO\N=C1C2=CC=CC=C2NC/1=C1\C(=O)NC2=CC=CC=C12
DB07788	[H][C@@]1(C)C\C=C\C(=O)[C@@]([H])(O)[C@@]([H])(O)C\C=C\C2=C(C(O)=CC(OC)=C2)C(=O)O1
DB07791	CNS(=O)(=O)C1=CC=C(NC2=NC(=CC=N2)C2=CN=C(C)N2C2CC2)C=C1
DB07802	CC1=C(Br)C(=O)OC2=C1C=CC(O)=C2Br
DB07812	[H][C@](CN)(NC(=O)C1=CC=C(S1)C1=C2C=CNC2=NC=C1)C1=CC=CC=C1
DB07829	FC1=CC=C(C=C1)C1=NNC=C1C1=CC=NC=C1
DB07845	COC1=C(NC2=NC3=C(C=CN3)C(NC3=CC=CC(F)=C3C(N)=O)=N2)C=CC(CS(C)(=O)=O)=C1
DB07852	CC1=NC(=NN1C1=CC(Cl)=CC(Cl)=C1)C(O)=O
DB07855	[H][C@](N)(C1=CC=CC=C1)C1=CC=C(C=C1)C1=NC=NC2=C1N=CN2
DB07860	[H][C@@](CN)(C1=CC=CC=C1)C1=CC=C(Cl)C=C1
DB07889	[H][C@@](O)(COC1=CC=C(NC2=NC(=CC=N2)C2=C(C)N=C3C=CC=CN23)C=C1)CN(C)C
DB07905	[H][C@@]12C[C@]([H])(O)[C@]([H])(O)C(=O)\C=C/C[C@]([H])(C)OC(=O)C3=C(O)C=C(OC)C=C3[C@@]1([H])O2
DB07942	FC1=CC=C(C=C1)C1=CNN=C1C1=CC=NC(F)=C1
DB07943	OCC(=O)N1CCC(CC1)C1=NNC(=C1C1=CC=NC=N1)C1=CC=C(Cl)C=C1
DB07966	N#CCC1=CC=C(NC2=NC3=CC=CC=C3C(NC3=NNC(=C3)C3CC3)=N2)C=C1
DB07996	[H][C@]1(C)CNCCN1S(=O)(=O)C1=CC=CC2=C1C=CN=C2
DB08011	O\N=C1\C(=O)N(CC2=CC(F)=CC3=C2OCOC3)C2=C1C=C(F)C=C2
DB08021	ClC1=CC=CC(NC(=O)C2=CC=C(Br)O2)=C1N1CCN(CC#C)CC1
DB08053	COC1=C(OC)C=C(C=C1)C1=NN(C2CCC2)C2=C1C(N)=NC=N2
DB08054	CC(C)N1N=C(C2=C1N=CN=C2N)C1=CC2=C(C=C1)N=CC=C2
DB08068	[H][C@@]1(F)C[C@]([H])(CC(=C1)C(=O)NC1=CC=C(Cl)C(COC2=CN=CC=C2)=C1)N1CCOCC1
DB08070	CC1=NNC=C1C1=CC=C(CCN)C=C1
DB08096	CCN1C(NC2=CC=CC=C2Cl)=NC2=CN=C(NC3=C(F)C=CC=C3F)N=C12
DB08097	CC(C)N1C(NC2=CC=CC=C2F)=NC2=C1N=C(OC1=C(F)C=CC=C1F)N=C2
DB08113	N1N=C(C2=C1C=CC=C2)C1=CC=NC=C1
DB08114	NC1=NC=C(CC2=CC=CC=C2)S1
DB08122	CNS(=O)(=O)C1=CC=C(N\C=C2/C(=O)NC3=C2C=CC=C3)C=C1
DB08123	CNS(=O)(=O)CC1=CC=C(N\N=C2/C(=O)NC3=C2C2=C(C=C3)N=CS2)C=C1
DB08124	O=C1NC2=CC=C(C=C2\C1=C\NC1=CC2=C(CS(=O)(=O)C2)C=C1)C1=CN=CO1
DB08125	O=C1NC2=CC=CC=C2\C1=C\NC1=CC=C(C=C1)S(=O)(=O)NC1=NC=CS1
DB08126	NC(=N)NS(=O)(=O)C1=CC=C(N\C=C2/C(=O)NC3=C2C=CC=C3)C=C1
DB08148	NCC1(CCN(CC1)C1=NC=NC2=C1C=CN2)C1=CC=C(Cl)C=C1
DB08149	NCC1(CC2=CC=C(Cl)C=C2)CCN(CC1)C1=NC=NC2=C1C=CN2
DB08150	[NH3+]C1(CC2=CC=C(Cl)C=C2)CCN(CC1)C1=NC=NC2=C1C=CN2
DB08178	COC1=C2C(NC=C2C2=CC=NC(N)=N2)=NC=C1
DB08182	CCCOC1=C2C(NC=C2C2=CC=NC(N)=N2)=NC=C1
DB08192	[H][C@]1(CC2=C(CN1)C=CC=C2)C1=NC(C(O)=O)=C(S1)C(C)C
DB08218	[O-][N+](=O)C1=CC=CC(=C1)\N=C1/N=CCC(=N/1)C1=CC=CC(CN2C=NC=N2)=C1
DB08219	CC1=C(SC(N)=N1)C1=N\C(\N=CC1)=N\C1=CC=C(C=C1)N1CCOCC1
DB08231	CCCCCCCCCCCCCC(O)=O
DB08233	OC1=CC=C(NC2=NC(OCC3CCCCC3)=C3N=CNC3=N2)C=C1
DB08241	NC(=O)C1=CC=C(NC2=NC(OCC3CCCCC3)=C3N=CNC3=N2)C=C1
DB08242	CNC(=O)C1=CC(NC2=NC=NC3=C2C=NN3C2=CC=CC=C2)=C(C)C=C1
DB08247	CC(C)C1=NC2=C(OCC3CCCCC3)N=C(N)N=C2N1
DB08248	NS(=O)(=O)C1=CC=CC(NC2=NC(OCC3CCCCC3)=C3N=CNC3=N2)=C1
DB08338	O=C1CCCCC2=C3N=C(NC4=CC=CC(N1)=C4)N=C(NC1CC1)N3N=C2
DB08340	N(C1=CC=CC=C1)C1=NC2=CC=NN2C(NC2=CC=CC=C2)=N1
DB08345	N#CC1=C2N=C(NC3=CC=CC=C3)N=C(NCCC3=CN=CN3)N2N=C1
DB08423	NC1=C(C=NN1C1=CC=C(F)C=C1)C(=O)C1=CC=CC(OC2CCNCC2)=C1
DB08454	CC1=CC(NC2=C3C=CC=CC3=NC(=N2)C2=CC=CC=C2)=NN1
DB08462	C=CC(=O)NC1=CC=C2N=CN=C(NC3=CC=CC=C3)C2=C1
DB08513	CC1=CC(NC2=NC(NC3=CC=C(CC(O)=O)C=C3)=NC=C2C(N)=O)=CC=C1
DB08521	C[S@@](=O)C1=CC=C(C=C1)C1=NC(=C(N1)C1=CC=NC=C1)C1=CC=C(F)C=C1
DB08555	COC1=C(Cl)C=C2C(CCN=C2C2=CC(Br)=CC=C2)=C1
DB08590	CC(C)(C)C(=O)OC1=CC2=C(C=C1)N(CCCO)C(NC(=O)C1=CC=CC(=C1)[N+]([O-])=O)=N2
DB08660	OC1=C(O)C2=C(C=C1)C(=O)C1=C(O)C=CC(O)=C1C2=O
DB08703	CC(C)OC1=CC2=C(C=C1)C1=C(CC2)C2=C(C3=C1C(=O)N=C3)C1=C(C=CC=C1)N2CCO
